# Supplementary material for: Recruitment strategies for predominantly low-income, multi-racial/ethnic children and parents to 3-year community-based intervention trials: Childhood Obesity Prevention and Treatment Research (COPTR) Consortium
Source: PubMed Central journal article supplement (PMC6540365; doi:10.1186/s13063-019-3418-0), 2019-05-28

# “Measure-Me” Visits

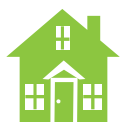

## Visit 1

A. Eligibility and Consent

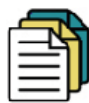

B. Height & Weight

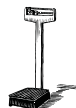

C. Survey

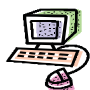

D. Food Recall

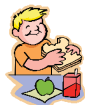

E. Activity Monitor

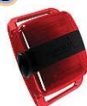

F. Child Vocabulary

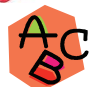

G. Hair Sample

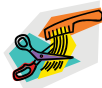

H. Home Food Inventory

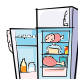

I. \$10 Gift Card

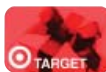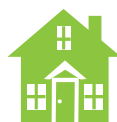

## Visit 2

A. Survey

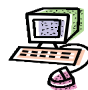

B. Food Recall

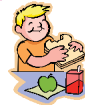

C. Activity Monitor

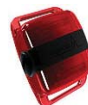

D. Child Vocabulary

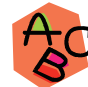

E. \$10 Gift Card

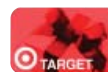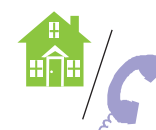

## Visit/Call 3

A. Food Recall

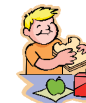

B. \$30 Gift Card by mail

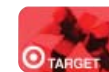

Supplement: 13063_2019_3418_MOESM3_ESM.pdf [file 13063_2019_3418_MOESM3_ESM.pdf]
