# Supplementary material for: Recruitment strategies for predominantly low-income, multi-racial/ethnic children and parents to 3-year community-based intervention trials: Childhood Obesity Prevention and Treatment Research (COPTR) Consortium
Source: PubMed Central journal article supplement (PMC6540365; doi:10.1186/s13063-019-3418-0), 2019-05-28
Supplement: 13063_2019_3418_MOESM2_ESM.pdf [file 13063_2019_3418_MOESM2_ESM.pdf]

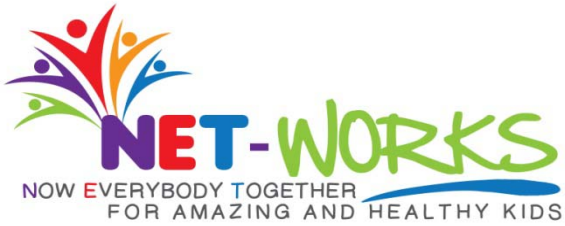

## 250 Families

NET-Works Group  
\*3 Years\*

 Information @  
Well-Child Visits

 Parenting Classes

 Home Visits &  
Phone Calls

## 500 Families

"Measure-Me" Visits

 &  & 

Up to \$50 in Gift Cards

Year-1 "Measure-Me" Visits

 &  & 

Up to \$50 in Gift Cards

Year-2 "Measure-Me" Visits

 &  & 

Up to \$50 in Gift Cards

Year-3 "Measure-Me" Visits

 &  & 

Up to \$50 in Gift Cards

## 250 Families

Comparison Group  
\*3 Years\*

 Information @  
Well-Child Visits

 School Readiness  
Mailings

Contact Us: (612) 624-9105 or [NET-Works@umn.edu](mailto:NET-Works@umn.edu)
